# Supplementary material for: Investigation of RIP140 and LCoR as independent markers for poor prognosis in cervical cancer
Source: PubMed Central journal article supplement (PMC5739643; doi:10.18632/oncotarget.22187), 2017-10-31
Supplement: oncotarget-08-105356-s001.pdf [file oncotarget-08-105356-s001.pdf]

## Investigation of RIP140 and LCoR as independent markers for poor prognosis in cervical cancer

### SUPPLEMENTARY MATERIALS

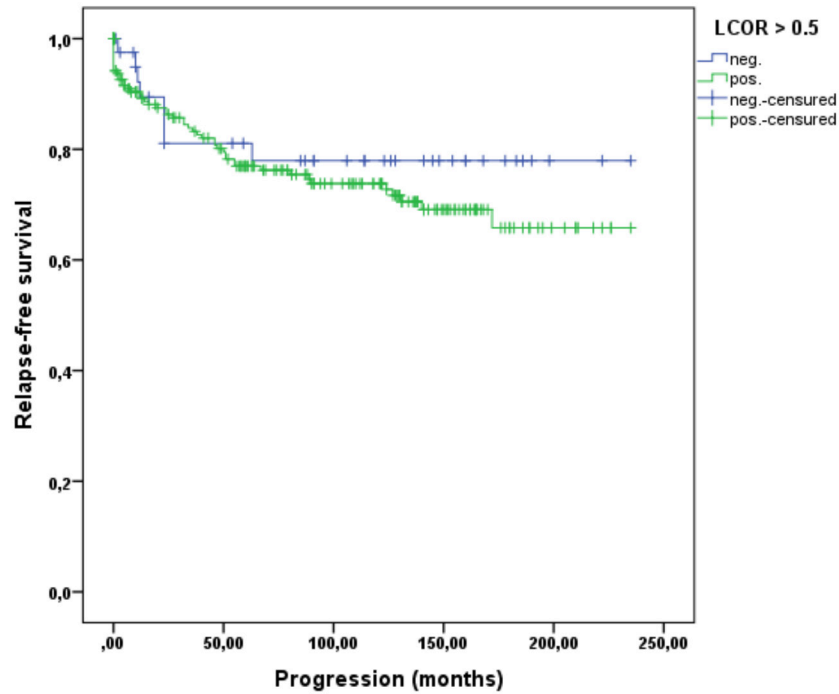

**Supplementary Figure 1: Relapse-free survival in patients with nuclear LCoR IRS>0.5 expression.** A trend for a shorter relapse-free survival can be seen in patients with nuclear LCoR IRS>0.5 expression in the primary cervical tumor ( $p=0.081$ ).
